# Supplementary material for: Charge localization increases chemical expansion in cerium-based oxides
Source: Royal Society of Chemistry journal article supplement (doi:10.1039/c2cp40754j), 2012-01-01
Supplement: c2cp40754j.pdf [file c2cp40754j.pdf]

## Supporting Information

# Charge Localization Increases Chemical Expansion in Cerium-based Oxides

Dario Marrocchelli,<sup>\*a,b</sup> Sean R Bishop,<sup>c,d</sup> Harry L Tuller,<sup>c</sup> Graeme W Watson<sup>b</sup> and  
Bilge Yildiz<sup>\*a</sup>

<sup>a</sup> Department of Nuclear Science and Engineering, Massachusetts Institute of Technology, Cambridge, MA, USA.

<sup>b</sup> School of Chemistry, Trinity College Dublin, College Green, Dublin 2, Ireland

<sup>c</sup> Department of Materials Science and Engineering, Massachusetts Institute of Technology, Cambridge, MA, USA

<sup>d</sup> International Institute for Carbon Neutral Energy Research (WPI-I2CNER) Kyushu University, Nishi-ku Fukuoka, Japan

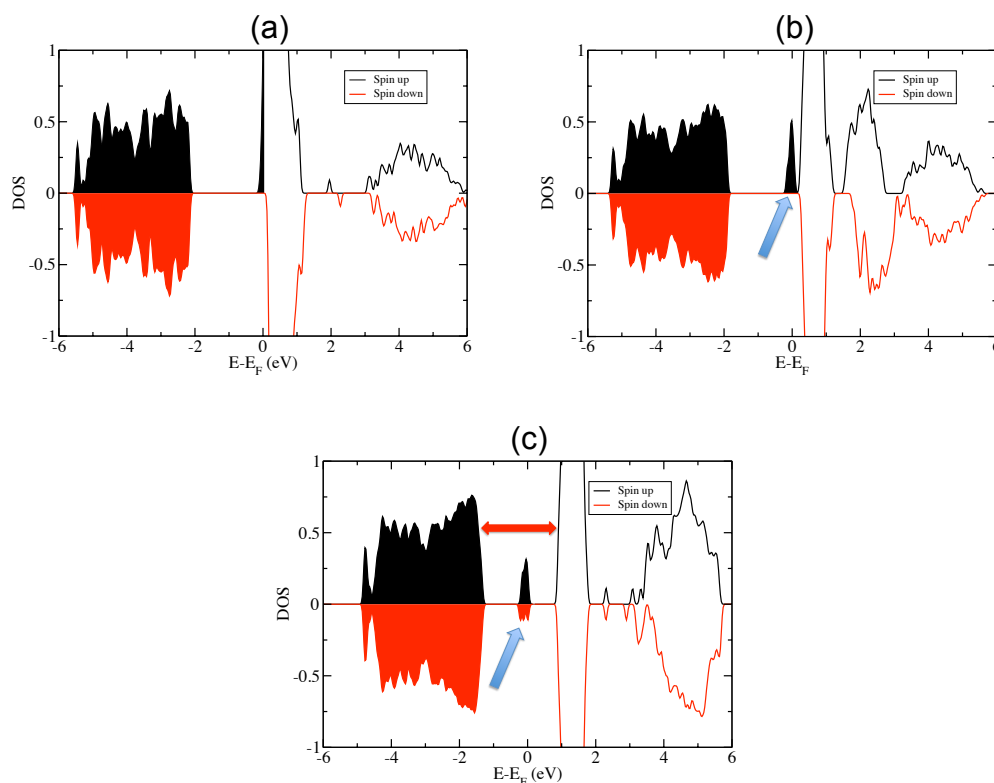

**Figure S 1:** Total Density of States (DOS) for  $U = 0, 3$  and  $5$  eV in (a), (b) and (c), respectively. Occupied states are indicated by shaded areas and energies are plotted with respect to the Fermi level. Simple DFT, (a), gives rise to a density of states with no energy gap between the valence and the conduction band, with the Ce 4f states crossing the Fermi level, i.e. a metallic solution. When the  $U$  term is added, the appearance of a new Ce 4f state occurs (see blue arrows in (b) and (c)) is observed. For  $U = 3$  eV, these occupied states are not fully separated from the unoccupied ones. This is achieved for  $U = 5$  eV, where we also observed the opening of a band gap (from the valence band to the unoccupied Ce 4f band) of 2.1 eV, as indicated by the red arrow in (c).

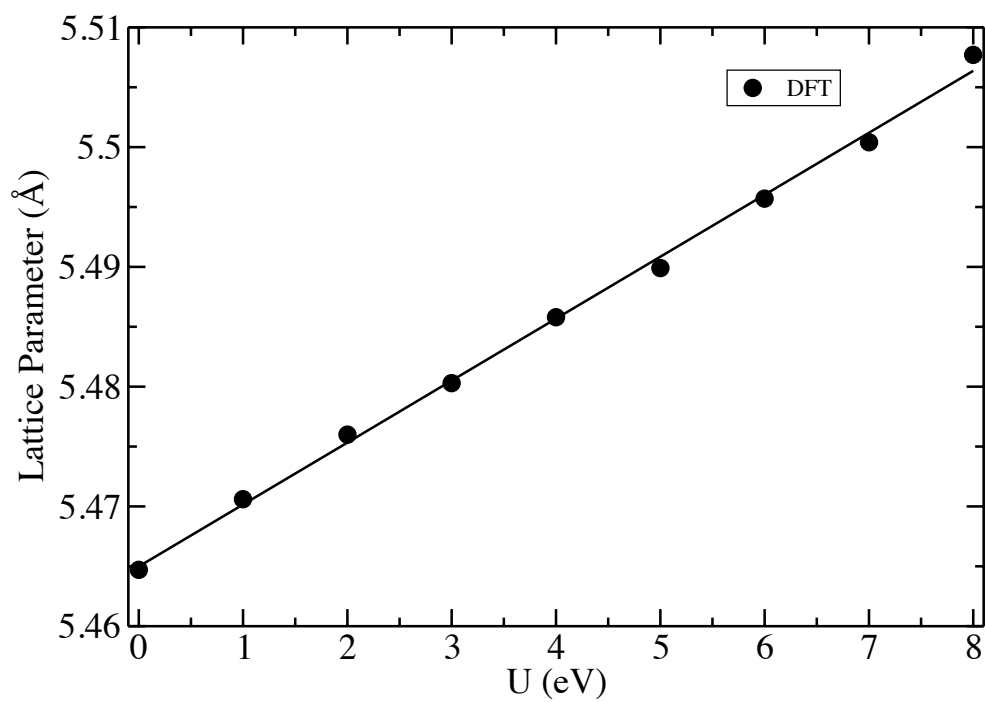

Figure S 2: Lattice parameter of CeO<sub>2</sub> vs Hubbard term, U. The points are from a DFT calculation whereas the straight line is a guide to the eye.

Table I: Ionic projected spin density of the  $\text{Ce}^{3+}$  cation shown in Figure 1 for different  $U$  values. For  $U > 5.0$  eV the spin density reaches a value of approximately 1, thus confirming the localization of the 4f electrons.

| U (eV) | $\text{Ce}^{3+}$ projected spin density |
|--------|-----------------------------------------|
| 0      | 0.048                                   |
| 1      | 0.069                                   |
| 2      | 0.025                                   |
| 3      | 0.655                                   |
| 4      | 0.893                                   |
| 5      | 0.941                                   |
| 6      | 0.955                                   |
| 7      | 0.965                                   |
| 8      | 0.972                                   |

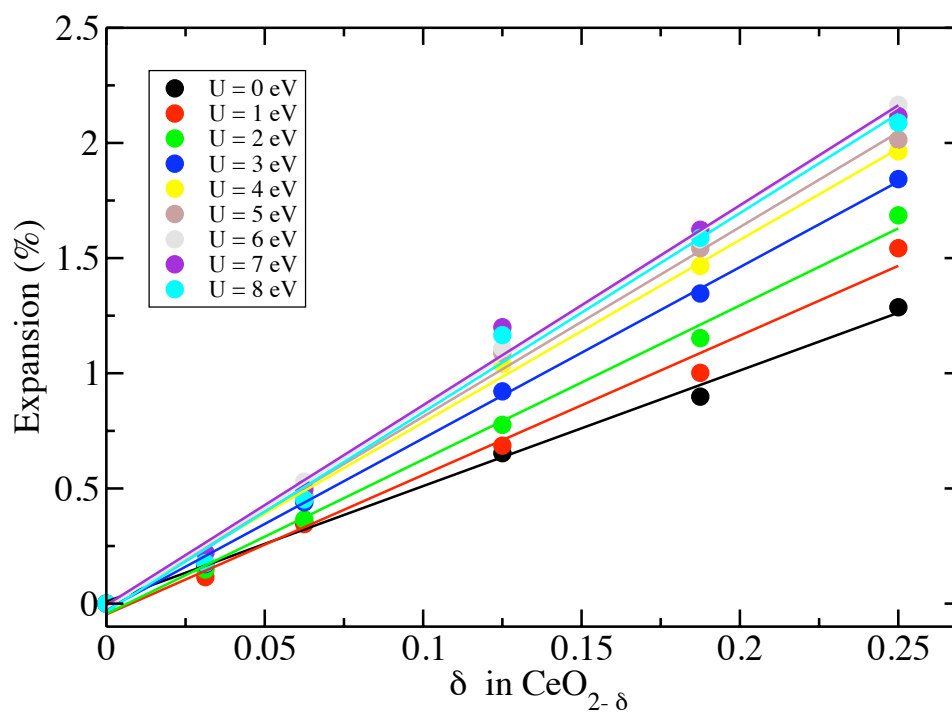

Figure S 3: : Lattice parameter expansion (%) vs  $\delta$  for  $\text{CeO}_{2-\delta}$  for different  $U$  values. Solid lines are linear fits.

Table II: Calculated ionic radii for different  $U$  values.

| $U$ (eV) | $\text{Ce}^{3+}$ ionic radius ( $\text{\AA}$ ) |
|----------|------------------------------------------------|
| 0        | 1.082                                          |
| 1        | 1.093                                          |
| 2        | 1.101                                          |
| 3        | 1.110                                          |
| 4        | 1.116                                          |
| 5        | 1.119                                          |
| 6        | 1.125                                          |
| 7        | 1.125                                          |
| 8        | 1.124                                          |

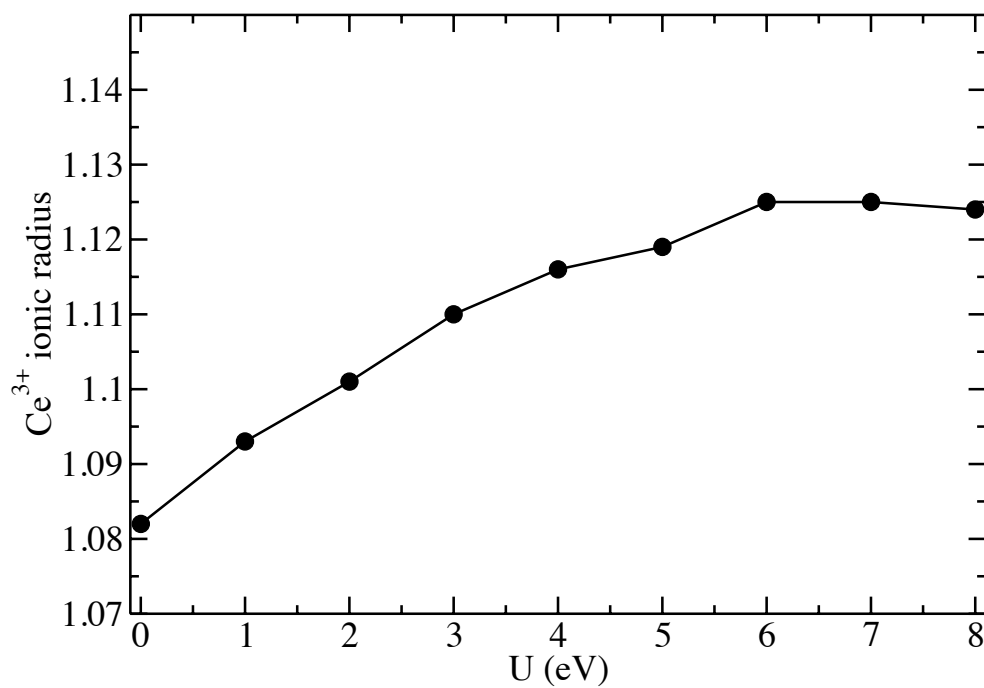

Figure S 4: Calculated ionic radii for different  $U$  values.
